# Supplementary material for: MicroRNA fingerprints in juvenile myelomonocytic leukemia (JMML) identified miR-150-5p as a tumor suppressor and potential target for treatment
Source: PubMed Central journal article supplement (PMC5342425; doi:10.18632/oncotarget.10577), 2016-07-13
Supplement: oncotarget-07-55395-s001.pdf [file oncotarget-07-55395-s001.pdf]

## MicroRNA fingerprints in Juvenile Myelomonocytic Leukemia (JMML) identified miR-150-5p as a tumor suppressor and potential target for treatment

### SUPPLEMENTARY FIGURE AND TABLES

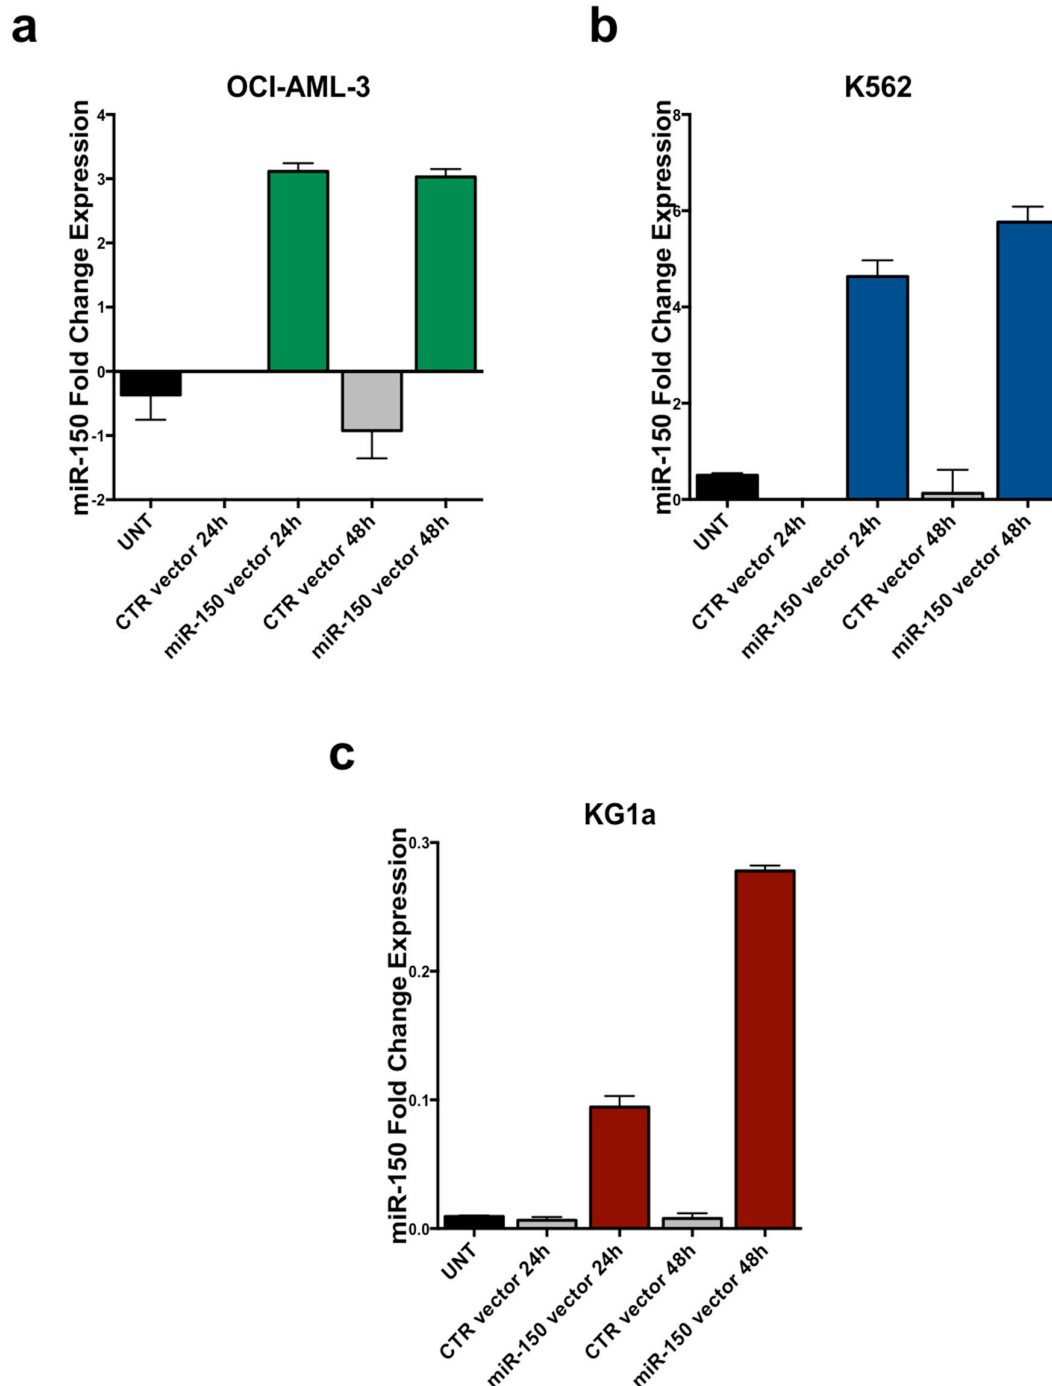

**Supplementary Figure S1: MiR-150-5p overexpression in AML cell lines.** miR-150-5p expression in OCI-AML-3 **a.**, K562 **b.** and KG1a **c.** cells after transfection with a miR-150-5p precursor overexpressing vector or empty vector (control) as measured by qRT-PCR. Results are expressed as fold change with respect to controls after 24 hours.

**Supplementary Table S1: Deregulated microRNAs in *PTPN11*, *KRAS* and *NRAS* subsets.**

See Supplementary File 1

**Supplementary Table S2: Supplemental Table S2. Complete Nanostring Analyzed microRNAs data.**

Complete list of analyzed microRNAs in JMML patients compared to Healthy Donors controls, performed using the nCounter Human v2 miRNA Expression Assay. Accession numbers from miRBase (<http://www.mirbase.org>) are reported. Statistical analyses were performed using nSolver Analysis Software (nanoString Technologies) and LIMMA package from the Bioconductor R project, as provided by the Carmaweb tool<sup>41</sup>

See Supplementary File 2
